# Supplementary material
Source: PubMed Central journal article supplement (PMC7223259)
Supplement: nqz274_supplemental_file.pdf [file nqz274_supplemental_file.pdf]

**Tea consumption and risk of stroke in Chinese adults: a prospective cohort study of 0.5 million men and women-----Tian Tian et al.-----Online Supplemental Material**

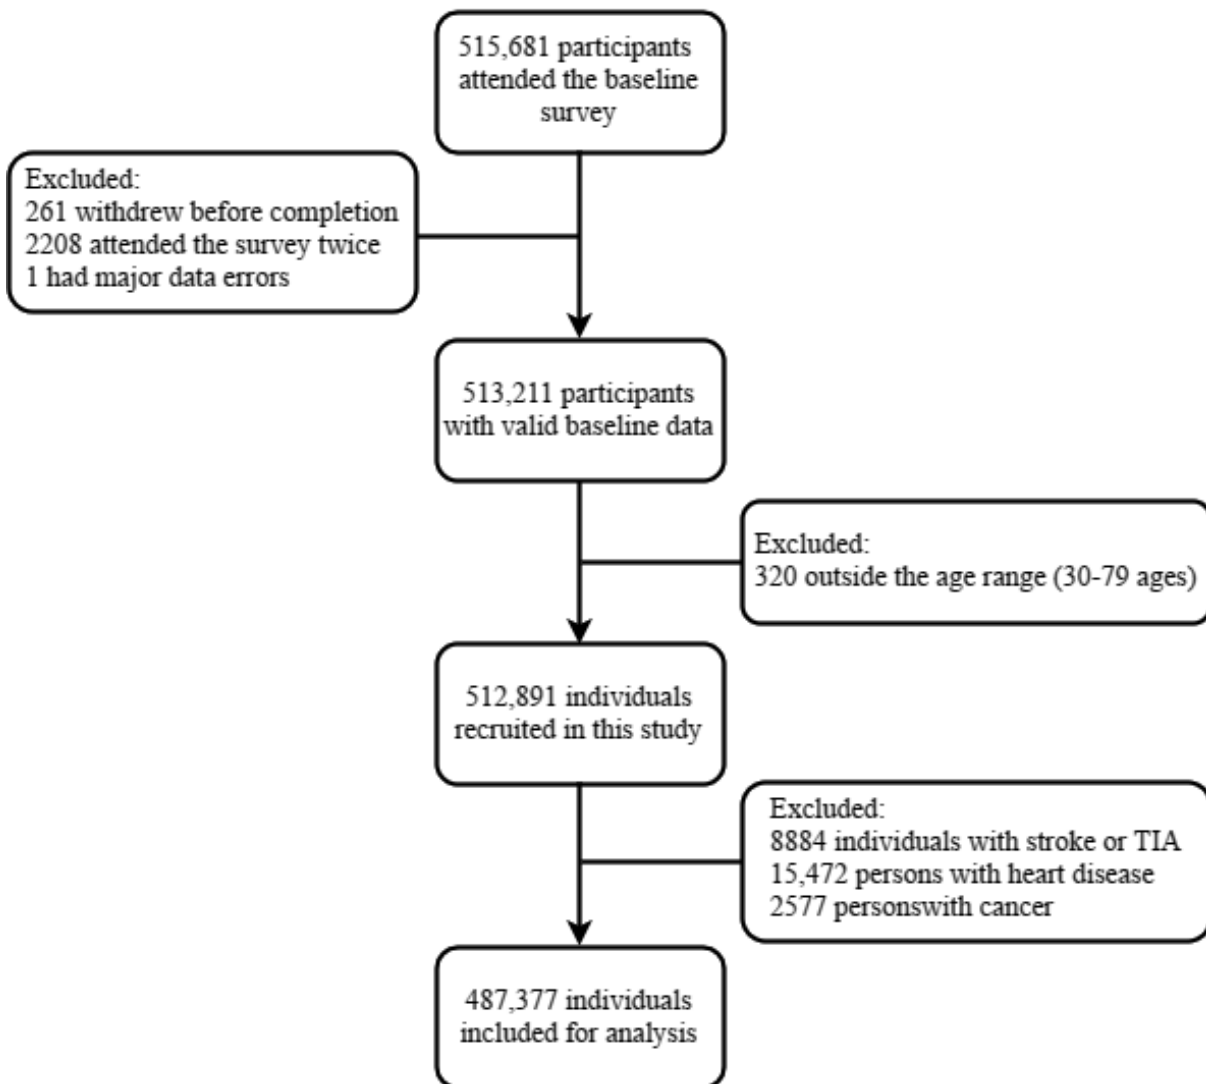

**Supplemental Figure 1. Participant flowchart**

Online Supplemental Material

**Supplemental Table 1. Baseline tea consumption characteristics of tea consumers.<sup>1</sup>**

| Characteristics of tea consumption <sup>2</sup>                 | All subjects | Men     | Women   |
|-----------------------------------------------------------------|--------------|---------|---------|
| Total tea consumers (n)                                         | 317,043      | 160,934 | 156,109 |
| Daily tea consumers (n)                                         | 128,280      | 82,467  | 45,813  |
| Daily tea drinkers among participants (%)                       | 26.3         | 41.4    | 15.9    |
| Commonly consumed tea type for daily tea consumers <sup>3</sup> |              |         |         |
| Green tea (%)                                                   | 86.7         | 82.4    | 92.1    |
| Non-green tea (%)                                               | 13.4         | 17.6    | 7.9     |
| Duration of tea consumption for daily tea consumers (years)     | 24.77        | 25.11   | 24.15   |
| Amount of tea consumption for daily tea consumers (grams/day)   | 4.26         | 4.78    | 3.33    |
| Amount of tea consumption for daily tea consumers (gram-years)  | 104.00       | 117.00  | 81.00   |

<sup>1</sup> The results were presented as the means or percentages, which were adjusted for age, gender and residential regions, as appropriate. *P* values calculated by analysis using either multiple linear regression (for continuous outcomes) or logistic regression (for binary outcomes) and the differences were statistically significant between men and women for all characteristics of tea consumption ( $P<0.001$ ).

<sup>2</sup> Commonly consumed tea type and other characteristics (duration and amount of tea consumed ) were calculated only among daily tea consumers.

<sup>3</sup> Non-green tea included black tea, oolong tea, and other types of tea.

Online Supplemental Material

**Supplemental Table 2. Association of tea consumption with stroke risk according to the duration and amount of tea consumption among male participants.**

| Variables of tea consumption <sup>1</sup> | Total stroke <sup>2</sup> |                                        | Ischemic stroke         |                                        | Hemorrhagic stroke      |                                        |
|-------------------------------------------|---------------------------|----------------------------------------|-------------------------|----------------------------------------|-------------------------|----------------------------------------|
|                                           | HR (95%CI) <sup>3</sup>   | <i>P</i> <sub>trend</sub> <sup>4</sup> | HR (95%CI) <sup>3</sup> | <i>P</i> <sub>trend</sub> <sup>4</sup> | HR (95%CI) <sup>3</sup> | <i>P</i> <sub>trend</sub> <sup>4</sup> |
| Never                                     | 1.00                      |                                        | 1.00                    |                                        | 1.00                    |                                        |
| Duration of tea consumption (years)       |                           | <b>&lt;0.001</b>                       |                         | <b>&lt;0.001</b>                       |                         | <b>&lt;0.001</b>                       |
| <19                                       | <b>0.93(0.87, 0.99)</b>   |                                        | 0.95(0.88, 1.02)        |                                        | <b>0.82(0.71, 0.94)</b> |                                        |
| 19-30                                     | <b>0.84(0.78, 0.90)</b>   |                                        | <b>0.84(0.78, 0.91)</b> |                                        | <b>0.79(0.68, 0.92)</b> |                                        |
| >30                                       | <b>0.91(0.85, 0.96)</b>   |                                        | <b>0.92(0.85, 0.99)</b> |                                        | <b>0.79(0.69, 0.91)</b> |                                        |
| Amount of tea consumption (grams/day)     |                           | <b>&lt;0.001</b>                       |                         | <b>0.002</b>                           |                         | <b>&lt;0.001</b>                       |
| <2                                        | <b>0.91(0.86, 0.97)</b>   |                                        | <b>0.90(0.84, 0.97)</b> |                                        | <b>0.86(0.75, 0.98)</b> |                                        |
| 2-4                                       | <b>0.89(0.84, 0.95)</b>   |                                        | <b>0.92(0.86, 0.99)</b> |                                        | <b>0.76(0.66, 0.87)</b> |                                        |
| >4                                        | <b>0.89(0.84, 0.95)</b>   |                                        | <b>0.90(0.84, 0.97)</b> |                                        | <b>0.78(0.68, 0.90)</b> |                                        |
| Amount of tea consumption (gram-years)    |                           | <b>&lt;0.001</b>                       |                         | <b>&lt;0.001</b>                       |                         | <b>&lt;0.001</b>                       |
| <46                                       | <b>0.94(0.88, 0.997)</b>  |                                        | 0.96(0.89, 1.03)        |                                        | <b>0.84(0.73, 0.97)</b> |                                        |
| 46-105                                    | <b>0.88(0.83, 0.94)</b>   |                                        | <b>0.89(0.83, 0.96)</b> |                                        | <b>0.80(0.69, 0.91)</b> |                                        |
| >105                                      | <b>0.88(0.83, 0.93)</b>   |                                        | <b>0.89(0.83, 0.95)</b> |                                        | <b>0.77(0.68, 0.88)</b> |                                        |

Values obtained with a Cox proportional hazards analysis.

<sup>1</sup> Variables of tea consumption (duration and amount of tea consumed) were only calculated among daily tea consumers.

<sup>2</sup> Including hemorrhagic stroke, ischemic stroke and stroke of unknown type.

<sup>3</sup> Adjusted for age, marital status, education, annual household income, smoking status, alcohol consumption, physical activity, BMI, history of hypertension, history of diabetes, intake frequencies of red meat, fresh fruits and fresh vegetables, and family history of stroke.

<sup>4</sup> *P*<sub>trend</sub>, *P* for linear trend test.

HR, hazard ratio; 95% CI, 95% confidence interval.

Online Supplemental Material

**Supplemental Table 3. Association of tea consumption with stroke risk according to the duration and amount of tea consumption among female participants.**

| Variables of tea consumption <sup>1</sup> | Total stroke <sup>2</sup> |                                        | Ischemic stroke         |                                        | Hemorrhagic stroke      |                                        |
|-------------------------------------------|---------------------------|----------------------------------------|-------------------------|----------------------------------------|-------------------------|----------------------------------------|
|                                           | HR (95%CI) <sup>3</sup>   | <i>P</i> <sub>trend</sub> <sup>4</sup> | HR (95%CI) <sup>3</sup> | <i>P</i> <sub>trend</sub> <sup>4</sup> | HR (95%CI) <sup>3</sup> | <i>P</i> <sub>trend</sub> <sup>4</sup> |
| Never                                     | 1.00                      |                                        | 1.00                    |                                        | 1.00                    |                                        |
| Duration of tea consumption (years)       |                           | 0.345                                  |                         | 0.581                                  |                         | 0.259                                  |
| <19                                       | 0.98(0.91, 1.05)          |                                        | 0.98(0.90, 1.06)        |                                        | 0.97(0.82, 1.14)        |                                        |
| 19-30                                     | 1.04(0.93, 1.15)          |                                        | 1.04(0.93, 1.19)        |                                        | 1.00(0.79, 1.27)        |                                        |
| >30                                       | 0.92(0.83, 1.03)          |                                        | 0.94(0.84, 1.06)        |                                        | 0.82(0.65, 1.05)        |                                        |
| Amount of tea consumption (grams/day)     |                           | 0.214                                  |                         | 0.302                                  |                         | 0.393                                  |
| <2                                        | 1.01(0.95, 1.09)          |                                        | 1.04(0.96, 1.12)        |                                        | 0.94(0.80, 1.10)        |                                        |
| 2-4                                       | 0.93(0.86, 1.01)          |                                        | 0.92(0.84, 1.00)        |                                        | 0.96(0.81, 1.14)        |                                        |
| >4                                        | 0.96(0.86, 1.07)          |                                        | 0.96(0.85, 1.09)        |                                        | 0.91(0.71, 1.16)        |                                        |
| Amount of tea consumption (gram-years)    |                           | 0.354                                  |                         | 0.62                                   |                         | 0.316                                  |
| <46                                       | 0.97(0.91, 1.04)          |                                        | 0.97(0.89, 1.04)        |                                        | 0.97(0.83, 1.13)        |                                        |
| 46-105                                    | 1.01(0.93, 1.10)          |                                        | 1.05(0.96, 1.16)        |                                        | 0.90(0.74, 1.09)        |                                        |
| >105                                      | 0.94(0.86, 1.04)          |                                        | 0.95(0.86, 1.06)        |                                        | 0.91(0.74, 1.12)        |                                        |

Values obtained with a Cox proportional hazards analysis.

<sup>1</sup> Variables of tea consumption (duration and amount of tea consumed) were only calculated among daily tea consumers.

<sup>2</sup> Including hemorrhagic stroke, ischemic stroke and stroke of unknown type.

<sup>3</sup> Adjusted for age, marital status, education, annual household income, smoking status, alcohol consumption, physical activity, BMI, history of hypertension, history of diabetes, intake frequencies of red meat, fresh fruits and fresh vegetables, and family history of stroke.

<sup>4</sup> *P*<sub>trend</sub>, *P* for linear trend test.

HR, hazard ratio; 95% CI, 95% confidence interval.

Online Supplemental Material

**Supplemental Table 4. Association of frequency of tea consumption with the risk of stroke according to types of tea.**

| Type of tea   | Stroke type               | No. of participants | Frequency of Tea Consumption |                         |                         |                         | <i>P</i> <sub>trend</sub> <sup>3</sup> |
|---------------|---------------------------|---------------------|------------------------------|-------------------------|-------------------------|-------------------------|----------------------------------------|
|               |                           |                     | Never                        | Occasional              | Weekly                  | Daily                   |                                        |
| Green tea     | No. of participants       | 462,752             | 170,334                      | 153,122                 | 29,341                  | 109,955                 |                                        |
|               | No. of person years       | 4,070,801           | 1,492,052                    | 1,353,461               | 260,417                 | 964,871                 |                                        |
|               | No. of cases              | 36,827              | 16,283                       | 10,628                  | 1860                    | 8056                    |                                        |
|               | HR (95% CI) <sup>1</sup>  |                     |                              |                         |                         |                         |                                        |
|               | Total stroke <sup>2</sup> |                     | 1.00                         | <b>0.96(0.93, 0.99)</b> | <b>0.90(0.86, 0.95)</b> | <b>0.89(0.86, 0.92)</b> | <0.001                                 |
|               | Ischemic stroke           |                     | 1.00                         | <b>0.96(0.93, 0.98)</b> | <b>0.91(0.86, 0.97)</b> | <b>0.90(0.86, 0.94)</b> | <0.001                                 |
|               | Hemorrhagic stroke        |                     | 1.00                         | 0.95(0.89, 1.02)        | <b>0.84(0.74, 0.94)</b> | <b>0.84(0.78, 0.91)</b> | <0.001                                 |
| Non-green tea | No. of participants       | 348,081             | 170,334                      | 153,122                 | 6300                    | 18,325                  |                                        |
|               | No. of person years       | 3,064,296           | 1,492,052                    | 1,353,461               | 56,356                  | 162,427                 |                                        |
|               | No. of cases              | 28,811              | 16,283                       | 10,628                  | 481                     | 1419                    |                                        |
|               | HR (95% CI) <sup>1</sup>  |                     |                              |                         |                         |                         |                                        |
|               | Total stroke <sup>2</sup> |                     | 1.00                         | <b>0.95(0.93, 0.98)</b> | <b>1.12(1.01, 1.23)</b> | 1.04(0.97, 1.12)        | 0.457                                  |
|               | Ischemic stroke           |                     | 1.00                         | <b>0.95(0.92, 0.98)</b> | 1.09(0.98, 1.21)        | 1.04(0.97, 1.13)        | 0.460                                  |
|               | Hemorrhagic stroke        |                     | 1.00                         | 0.95(0.88, 1.01)        | 1.29(0.99, 1.66)        | 1.01(0.84, 1.20)        | 0.549                                  |

Values obtained with a Cox proportional hazards analysis.

<sup>1</sup> Adjusted for age, gender, marital status, education, annual household income, smoking status, alcohol consumption, physical activity, BMI, history of hypertension, history of diabetes, intake frequencies of red meat, fresh fruits and fresh vegetables, and family history of stroke.

<sup>2</sup> Including hemorrhagic stroke, ischemic stroke and stroke of unknown type.

<sup>3</sup> *P*<sub>trend</sub>, *P* for linear trend test.

HR, hazard ratio; 95% CI, 95% confidence interval.

**Supplemental Table 5. Association of green tea consumption with stroke risk according to the duration and amount of tea consumption.**

| Variables of tea consumption <sup>1</sup> | Total stroke <sup>2</sup> |                                        | Ischemic stroke         |                                        | Hemorrhagic stroke      |                                        |
|-------------------------------------------|---------------------------|----------------------------------------|-------------------------|----------------------------------------|-------------------------|----------------------------------------|
|                                           | HR (95%CI) <sup>3</sup>   | <i>P</i> <sub>trend</sub> <sup>4</sup> | HR (95%CI) <sup>3</sup> | <i>P</i> <sub>trend</sub> <sup>4</sup> | HR (95%CI) <sup>3</sup> | <i>P</i> <sub>trend</sub> <sup>4</sup> |
| Never                                     | 1.00                      |                                        | 1.00                    |                                        | 1.00                    |                                        |
| Duration of tea consumption (years)       |                           | <0.001                                 |                         | <0.001                                 |                         | <0.001                                 |
| <19                                       | <b>0.92(0.87, 0.97)</b>   |                                        | <b>0.93(0.88, 0.99)</b> |                                        | <b>0.86(0.77, 0.97)</b> |                                        |
| 19-30                                     | <b>0.87(0.82, 0.92)</b>   |                                        | <b>0.88(0.82, 0.94)</b> |                                        | <b>0.82(0.72, 0.94)</b> |                                        |
| >30                                       | <b>0.89(0.84, 0.94)</b>   |                                        | <b>0.90(0.84, 0.96)</b> |                                        | <b>0.77(0.68, 0.88)</b> |                                        |
| Amount of tea consumption (grams/day)     |                           | <0.001                                 |                         | <0.001                                 |                         | <0.001                                 |
| <2                                        | <b>0.93(0.89, 0.98)</b>   |                                        | 0.95(0.89, 1.00)        |                                        | <b>0.86(0.77, 0.96)</b> |                                        |
| 2-4                                       | <b>0.87(0.82, 0.91)</b>   |                                        | <b>0.88(0.83, 0.94)</b> |                                        | <b>0.79(0.70, 0.88)</b> |                                        |
| >4                                        | <b>0.89(0.84, 0.94)</b>   |                                        | <b>0.89(0.84, 0.95)</b> |                                        | <b>0.81(0.71, 0.92)</b> |                                        |
| Amount of tea consumption (gram-years)    |                           | <0.001                                 |                         | <0.001                                 |                         | <0.001                                 |
| <46                                       | <b>0.92(0.88, 0.97)</b>   |                                        | <b>0.93(0.88, 0.99)</b> |                                        | <b>0.87(0.78, 0.97)</b> |                                        |
| 46-105                                    | <b>0.90(0.85, 0.95)</b>   |                                        | <b>0.92(0.86, 0.98)</b> |                                        | <b>0.80(0.71, 0.90)</b> |                                        |
| >105                                      | <b>0.87(0.82, 0.91)</b>   |                                        | <b>0.88(0.82, 0.93)</b> |                                        | <b>0.78(0.70, 0.88)</b> |                                        |

Values obtained with a Cox proportional hazards analysis.

<sup>1</sup> Variables of tea consumption (duration and amount of tea consumed) were only calculated among daily tea consumers.

<sup>2</sup> Including hemorrhagic stroke, ischemic stroke and stroke of unknown type.

<sup>3</sup> Adjusted for age, gender, marital status, education, annual household income, smoking status, alcohol consumption, physical activity, BMI, history of hypertension, history of diabetes, intake frequencies of red meat, fresh fruits and fresh vegetables, and family history of stroke.

<sup>4</sup> *P*<sub>trend</sub>, *P* for linear trend test.

HR, hazard ratio; 95% CI, 95% confidence interval.

Online Supplemental Material

**Supplemental Table 6. Association of non-green tea consumption with stroke risk according to the duration and amount of tea consumption.**

| Variables of tea consumption <sup>1</sup> | Total stroke <sup>2</sup> |                                        | Ischemic stroke         |                                        | Hemorrhagic stroke      |                                        |
|-------------------------------------------|---------------------------|----------------------------------------|-------------------------|----------------------------------------|-------------------------|----------------------------------------|
|                                           | HR (95%CI) <sup>3</sup>   | <i>P</i> <sub>trend</sub> <sup>4</sup> | HR (95%CI) <sup>3</sup> | <i>P</i> <sub>trend</sub> <sup>4</sup> | HR (95%CI) <sup>3</sup> | <i>P</i> <sub>trend</sub> <sup>4</sup> |
| Never                                     | 1.00                      |                                        | 1.00                    |                                        | 1.00                    |                                        |
| Duration of tea consumption (years)       |                           | 0.131                                  |                         | 0.113                                  |                         | 0.848                                  |
| <19                                       | <b>1.12(1.02, 1.23)</b>   |                                        | <b>1.12(1.01, 1.25)</b> |                                        | 1.03(0.78, 1.37)        |                                        |
| 19-30                                     | 0.99(0.86, 1.13)          |                                        | 0.98(0.84, 1.14)        |                                        | 1.08(0.77, 1.51)        |                                        |
| >30                                       | 1.07(0.95, 1.19)          |                                        | 1.09(0.96, 1.24)        |                                        | 1.00(0.77, 1.30)        |                                        |
| Amount of tea consumption (grams/day)     |                           | 0.08                                   |                         | 0.045                                  |                         | 0.733                                  |
| <2                                        | 1.05(0.94, 1.18)          |                                        | 1.02(0.90, 1.15)        |                                        | 1.18(0.90, 1.56)        |                                        |
| 2-4                                       | <b>1.13(1.03, 1.26)</b>   |                                        | <b>1.15(1.03, 1.28)</b> |                                        | 1.08(0.83, 1.42)        |                                        |
| >4                                        | 1.03(0.92, 1.16)          |                                        | 1.08(0.95, 1.23)        |                                        | 0.83(0.61, 1.11)        |                                        |
| Amount of tea consumption (gram-years)    |                           | 0.126                                  |                         | 0.098                                  |                         | 0.942                                  |
| <46                                       | <b>1.12(1.01, 1.24)</b>   |                                        | 1.11(0.996, 1.24)       |                                        | 1.09(0.81, 1.46)        |                                        |
| 46-105                                    | 1.04(0.92, 1.17)          |                                        | 1.05(0.92, 1.20)        |                                        | 1.04(0.77, 1.41)        |                                        |
| >105                                      | 1.06(0.95, 1.18)          |                                        | 1.08(0.95, 1.22)        |                                        | 0.98(0.75, 1.27)        |                                        |

Values obtained with a Cox proportional hazards analysis.

<sup>1</sup> Variables of tea consumption (duration and amount of tea consumed) were only calculated among daily tea consumers.

<sup>2</sup> Including hemorrhagic stroke, ischemic stroke and stroke of unknown type.

<sup>3</sup> Adjusted for age, gender, marital status, education, annual household income, smoking status, alcohol consumption, physical activity, BMI, history of hypertension, history of diabetes, intake frequencies of red meat, fresh fruits and fresh vegetables, and family history of stroke.

<sup>4</sup> *P*<sub>trend</sub>, *P* for linear trend test.

HR, hazard ratio; 95% CI, 95% confidence interval.

Online Supplemental Material

**Supplemental Table 7. Association of tea consumption with stroke risk among non-current drinkers/smokers for males.**

| Population for analysis     | No. of participants | Frequency of tea consumption |                          |                         |                         | $P_{\text{trend}}^3$ |
|-----------------------------|---------------------|------------------------------|--------------------------|-------------------------|-------------------------|----------------------|
|                             |                     | Never                        | Occasional               | Weekly                  | Daily                   |                      |
| <b>Non-current smokers</b>  |                     |                              |                          |                         |                         |                      |
| No. of participants         | 75,513              | 19,509                       | 25,367                   | 7320                    | 23,317                  |                      |
| No. of person years         | 646,115             | 162,650                      | 218,427                  | 63,818                  | 201,220                 |                      |
| No. of cases                | 7668                | 2651                         | 2286                     | 559                     | 2172                    |                      |
| Model 1 <sup>1</sup>        |                     | 1.00                         | <b>0.93(0.88, 0.99)</b>  | <b>0.86(0.79, 0.95)</b> | <b>0.91(0.86, 0.97)</b> | <b>0.005</b>         |
| Model 2 <sup>2</sup>        |                     | 1.00                         | 0.95(0.89, 1.00)         | <b>0.87(0.79, 0.96)</b> | <b>0.89(0.84, 0.96)</b> | <b>0.001</b>         |
| <b>Non-current drinkers</b> |                     |                              |                          |                         |                         |                      |
| No. of participants         | 109,596             | 25,336                       | 32,446                   | 9301                    | 42,513                  |                      |
| No. of person years         | 940,227             | 211,010                      | 280,669                  | 80,909                  | 367,639                 |                      |
| No. of cases                | 10,458              | 3386                         | 2770                     | 713                     | 3589                    |                      |
| Model 1 <sup>1</sup>        |                     | 1.00                         | <b>0.92(0.87, 0.97)</b>  | <b>0.89(0.81, 0.97)</b> | <b>0.87(0.82, 0.92)</b> | <b>&lt;0.001</b>     |
| Model 2 <sup>2</sup>        |                     | 1.00                         | <b>0.94(0.89, 0.995)</b> | <b>0.90(0.83, 0.98)</b> | <b>0.86(0.81, 0.92)</b> | <b>&lt;0.001</b>     |

Values obtained with a Cox proportional hazards analysis.

<sup>1</sup> Model 1: Hazard ratio (95% confidence interval) was achieved after adjusted for age and gender.

<sup>2</sup> Model 2: Hazard ratio (95% confidence interval) was achieved after adjusted for age, gender, marital status, education, annual household income, smoking status, alcohol consumption, physical activity, BMI, history of hypertension, history of diabetes, intake frequencies of red meat, fresh fruits and fresh vegetables, and family history of stroke.

<sup>3</sup>  $P_{\text{trend}}$ ,  $P$  for linear trend test.



**Supplemental Table 8. Association of tea consumption with stroke risk among participants over forty.**

| Stroke type               | Frequency of tea consumption |                         |                         |                          | $P_{\text{trend}}^4$ |
|---------------------------|------------------------------|-------------------------|-------------------------|--------------------------|----------------------|
|                           | Never                        | Occasional              | Weekly                  | Daily                    |                      |
| No. of participants       | 145,946                      | 123,824                 | 28,475                  | 111,671                  |                      |
| No. of person years       | 1,264,798                    | 1,082,395               | 250,146                 | 971,899                  |                      |
| Total stroke <sup>1</sup> |                              |                         |                         |                          |                      |
| No. of cases              | 15,926                       | 10,218                  | 2236                    | 9234                     |                      |
| Model 1 <sup>2</sup>      | 1.00                         | <b>0.95(0.93, 0.98)</b> | <b>0.94(0.90, 0.98)</b> | <b>0.94(0.91, 0.97)</b>  | <b>&lt;0.001</b>     |
| Model 2 <sup>3</sup>      | 1.00                         | <b>0.96(0.93, 0.99)</b> | <b>0.94(0.89, 0.98)</b> | <b>0.91(0.88, 0.95)</b>  | <b>&lt;0.001</b>     |
| Ischemic stroke           |                              |                         |                         |                          |                      |
| No. of cases              | 13,037                       | 8115                    | 1723                    | 6662                     |                      |
| Model 1 <sup>2</sup>      | 1.00                         | <b>0.96(0.93, 0.98)</b> | <b>0.95(0.90, 1.01)</b> | <b>0.96(0.92, 0.995)</b> | <b>0.022</b>         |
| Model 2 <sup>3</sup>      | 1.00                         | <b>0.96(0.93, 0.98)</b> | <b>0.94(0.89, 0.99)</b> | <b>0.92(0.88, 0.95)</b>  | <b>&lt;0.001</b>     |
| Hemorrhagic stroke        |                              |                         |                         |                          |                      |
| No. of cases              | 2337                         | 1727                    | 422                     | 2175                     |                      |
| Model 1 <sup>2</sup>      | 1.00                         | <b>0.92(0.85, 0.98)</b> | <b>0.85(0.76, 0.95)</b> | <b>0.85(0.79, 0.92)</b>  | <b>&lt;0.001</b>     |
| Model 2 <sup>3</sup>      | 1.00                         | 0.96(0.89, 1.02)        | <b>0.89(0.79, 0.99)</b> | <b>0.86(0.80, 0.93)</b>  | <b>&lt;0.001</b>     |

Values obtained with a Cox proportional hazards analysis.

<sup>1</sup> Including hemorrhagic stroke, ischemic stroke and stroke of unknown type.

<sup>2</sup> Model 1: Hazard ratio (95% confidence interval) was achieved after adjusted for age and gender.

<sup>3</sup> Model 2: Hazard ratio (95% confidence interval) was achieved after adjusted for age, gender, marital status, education, annual household income, smoking status, alcohol consumption, physical activity, BMI, history of hypertension, history of diabetes, intake frequencies of red meat, fresh fruits and fresh vegetables, and family history of stroke.

<sup>4</sup>  $P_{\text{trend}}$ ,  $P$  for linear trend test.

## Online Supplemental Material

### **Supplemental Acknowledgments:**

The chief acknowledgment is to the participants, the project staff, and the China National Centre for Disease Control and Prevention (CDC) and its regional offices for assisting with the fieldwork. We thank Judith Mackay in Hong Kong; Yu Wang, Gonghuan Yang, Zhengfu Qiang, Lin Feng, Maigeng Zhou, Wenhua Zhao, and Yan Zhang in China CDC; Lingzhi Kong, Xiucheng Yu, and Kun Li in the Chinese Ministry of Health; and Sarah Clark, Martin Radley, Mike Hill, Hongchao Pan, and Jill Boreham in the CTSU, Oxford, for assisting with the design, planning, organization, and conduct of the study.

### **Members of the China Kadoorie Biobank collaborative group:**

**International Steering Committee:** Junshi Chen, Zhengming Chen (PI), Robert Clarke, Rory Collins, Yu Guo, Liming Li (PI), Jun Lv, Richard Peto, Robin Walters. **International Co-ordinating Centre, Oxford:** Daniel Avery, Ruth Boxall, Derrick Bennett, Yumei Chang, Yiping Chen, Zhengming Chen, Robert Clarke, Huaidong Du, Simon Gilbert, Alex Hacker, Mike Hill, Michael Holmes, Andri Iona, Christiana Kartsonaki, Rene Kerosi, Ling Kong, Om Kurmi, Garry Lancaster, Sarah Lewington, Kuang Lin, John McDonnell, Iona Millwood, Qunhua Nie, Jayakrishnan Radhakrishnan, Paul Ryder, Sam Sansome, Dan Schmidt, Paul Sherliker, Rajani Sohoni, Becky Stevens, Iain Turnbull, Robin Walters, Jenny Wang, Lin Wang, Neil Wright, Ling Yang, Xiaoming Yang. **National Co-ordinating Centre, Beijing:** Zheng Bian, Yu Guo, Xiao Han, Can Hou, Jun Lv, Pei Pei, Chao Liu, Canqing Yu. **10 Regional Co-ordinating Centres: Qingdao CDC:** Zengchang Pang, Ruqin Gao, Shanpeng Li, Shaojie Wang, Yongmei Liu, Ranran Du, Yajing Zang, Liang Cheng, Xiaocao Tian, Hua Zhang, Yaoming Zhai, Feng Ning, Xiaohui Sun, Feifei Li. **Licang CDC:** Silu Lv, Junzheng Wang, Wei Hou. **Heilongjiang Provincial CDC:** Mingyuan Zeng, Ge Jiang, Xue Zhou. **Nangang CDC:** Liqiu Yang, Hui He, Bo Yu, Yanjie Li, Qinai Xu, Quan Kang, Ziyang Guo. **Hainan Provincial CDC:** Dan Wang, Ximin Hu, Jinyan Chen, Yan Fu, Zhenwang Fu,

Xiaohuan Wang. **Meilan CDC:** Min Weng, Zhendong Guo, Shukuan Wu, Yilei Li, Huimei Li, Zhifang Fu. **Jiangsu Provincial CDC:** Ming Wu, Yonglin Zhou, Jinyi Zhou, Ran Tao, Jie Yang, Jian Su. **Suzhou CDC:** Fang liu, Jun Zhang, Yihe Hu, Yan Lu, , Liangcai Ma, Aiyu Tang, Shuo Zhang, Jianrong Jin, Jingchao Liu. **Guangxi Provincial CDC:** Zhenzhu Tang, Naying Chen, Ying Huang. **Liuzhou CDC:** Mingqiang Li, Jinhuai Meng, Rong Pan, Qilian Jiang, Jian Lan, Yun Liu, Liuping Wei, Liyuan Zhou, Ningyu Chen Ping Wang, Fanwen Meng, Yulu Qin,, Sisi Wang. **Sichuan Provincial CDC:** Xianping Wu, Ningmei Zhang, Xiaofang Chen, Weiwei Zhou. **Pengzhou CDC:** Guojin Luo, Jianguo Li, Xiaofang Chen, Xunfu Zhong, Jiaqiu Liu, Qiang Sun. **Gansu Provincial CDC:** Pengfei Ge, Xiaolan Ren, Caixia Dong. **Maiji CDC:** Hui Zhang, Enke Mao, Xiaoping Wang, Tao Wang, Xi zhang. **Henan Provincial CDC:** Ding Zhang, Gang Zhou, Shixian Feng, Liang Chang, Lei Fan. **Huixian CDC:** Yulian Gao, Tianyou He, Huarong Sun, Pan He, Chen Hu, Xukui Zhang, Huifang Wu, Pan He. **Zhejiang Provincial CDC:** Min Yu, Ruying Hu, Hao Wang. **Tongxiang CDC:** Yijian Qian, Chunmei Wang, Kaixu Xie, Lingli Chen, Yidan Zhang, Dongxia Pan, Qijun Gu. **Hunan Provincial CDC:** Yuelong Huang, Biyun Chen, Li Yin, Huilin Liu, Zhongxi Fu, Qiaohua Xu. **Liuyang CDC:** Xin Xu, Hao Zhang, Huajun Long, Xianzhi Li, Libo Zhang, Zhe Qiu.
